# Supplementary material for: Phenotypic Variability in the Coccolithophore Emiliania huxleyi
Source: PLOS journal article supplement (doi:10.1371/journal.pone.0157697), 2016-06-27

**Supporting information**

**S1 Fig. Comparison of carbon measurements.** We used particulate carbon parameters (PIC, POC and TPC) determined with two different techniques: (1) carbon concentration using an elemental analyzer, and (2) calcium concentration using ICP-AES, and results were compared. This was done to compare the two most used carbon-measuring techniques in the literature and assess possible errors or deviations.


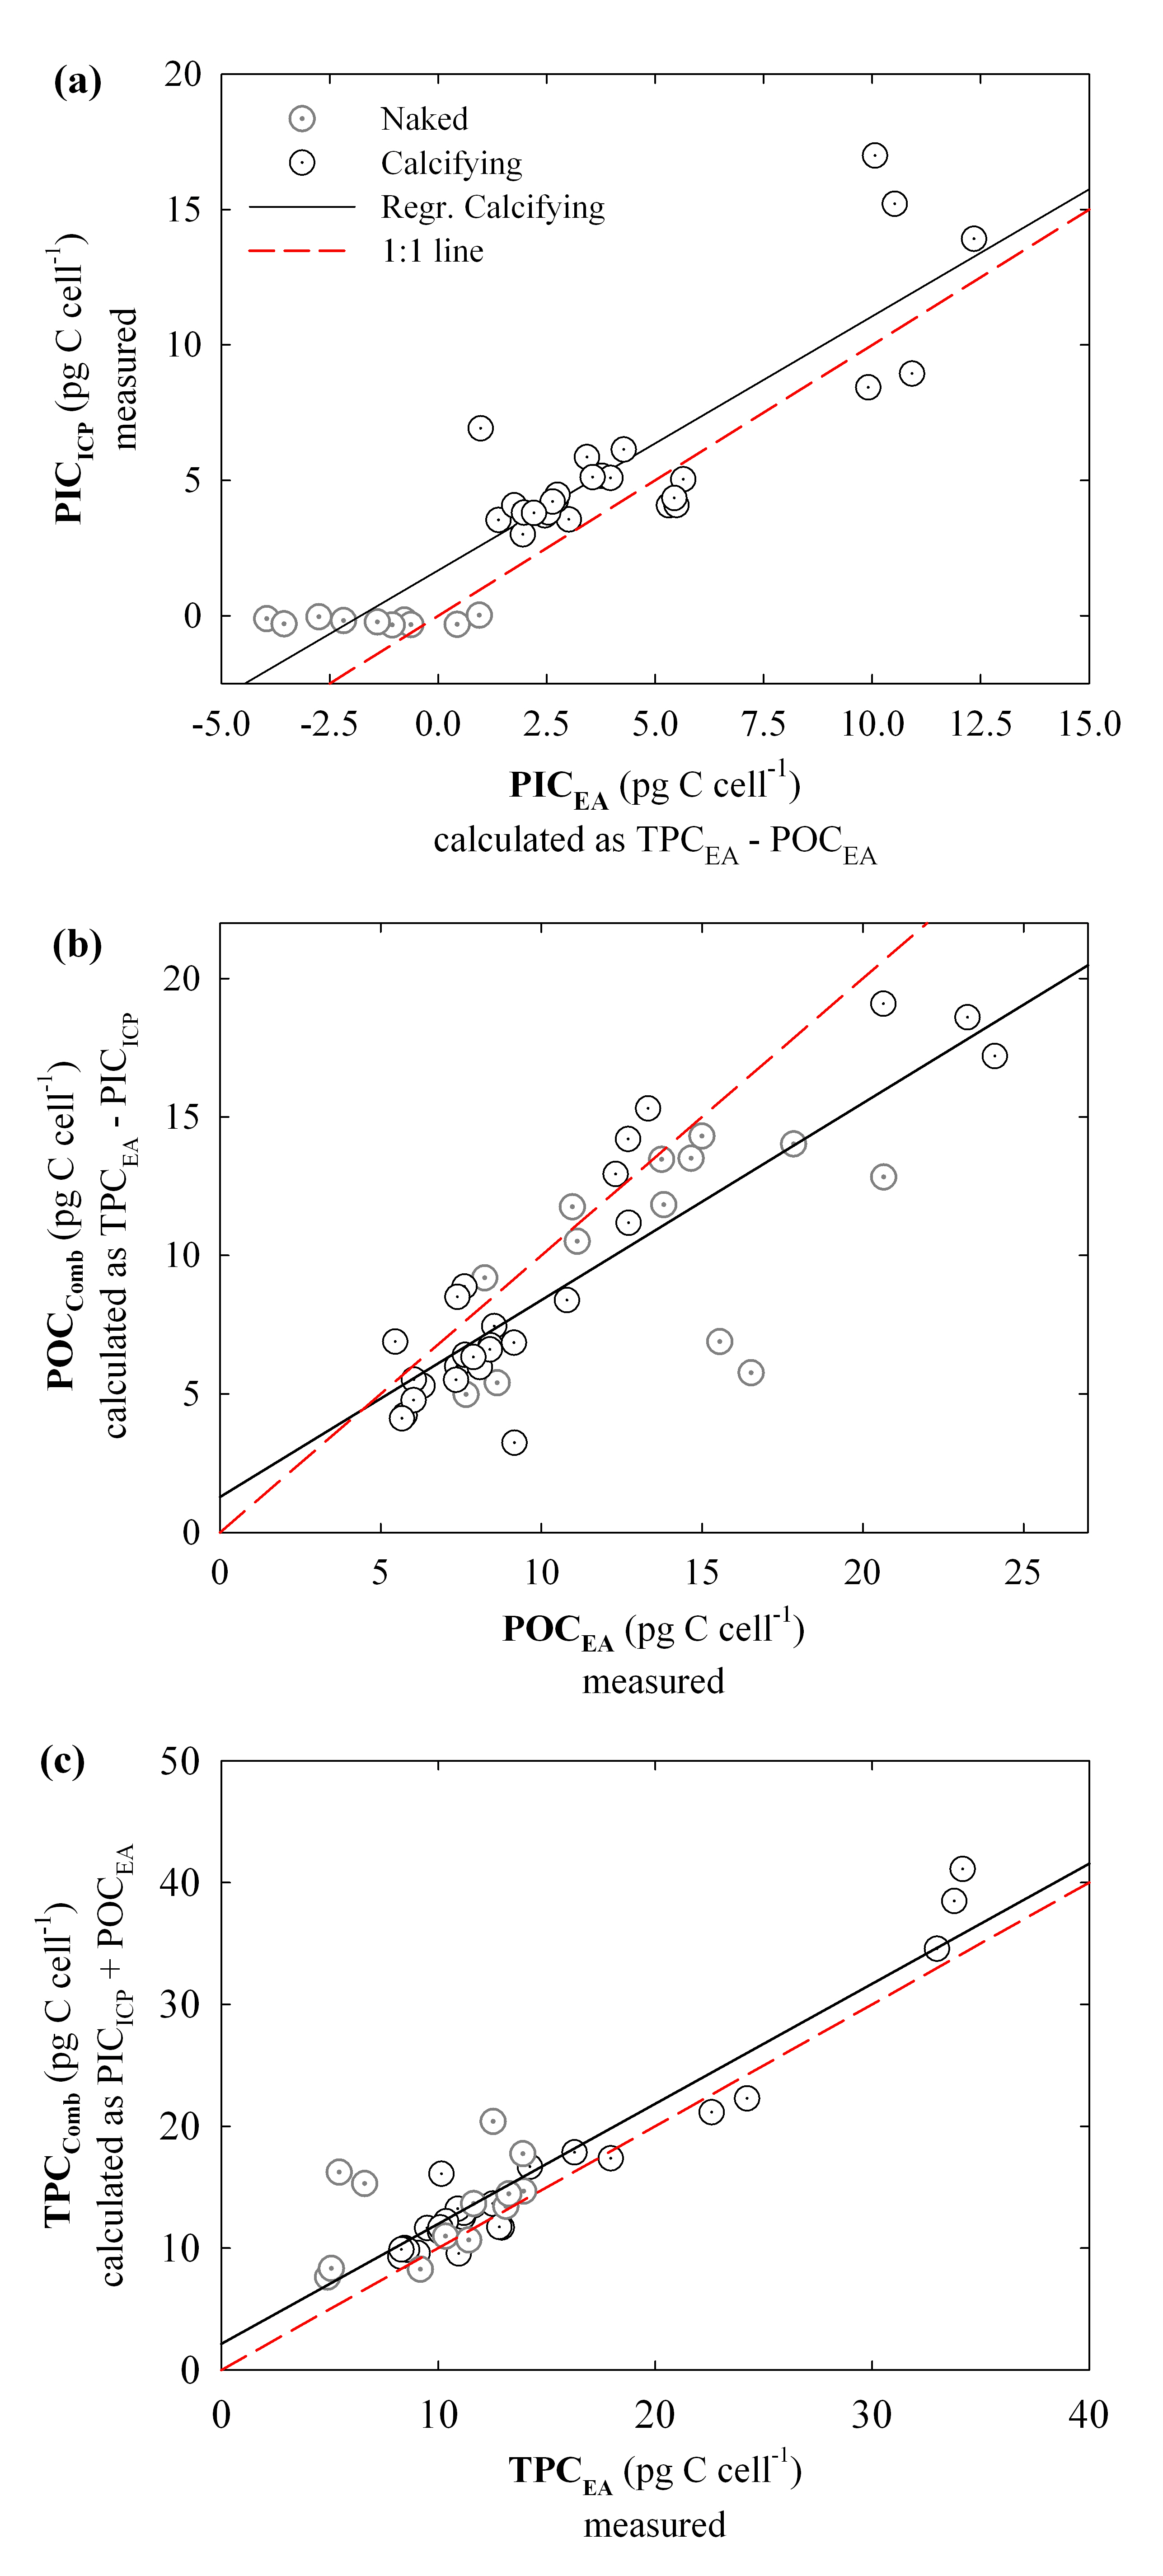

Supplement: S1 (10.1371/journal.pone.0157697.s001) [file journal.pone.0157697.s001.doc]
